# Supplementary material
Source: PubMed Central journal article supplement (PMC4733646)
Supplement: NIHMS750319-supplement-Appendix.pdf [file NIHMS750319-supplement-Appendix.pdf]

| Orig. Item # | New Item # | CHAMPS ITEMS                                                  | Comparable MET Values From Ainsworth and Colleagues 2000 and rationale for adjustment                             | 1993 Comp MET | Orig. MET | 2000 Comp MET | Final MET | Cat. |
|--------------|------------|---------------------------------------------------------------|-------------------------------------------------------------------------------------------------------------------|---------------|-----------|---------------|-----------|------|
| NEW          | 22         | Watch TV                                                      | Consensus of:<br>lying quietly and watching television = 1.0<br>sitting quietly and watching television = 1.0     |               |           | 1             | 1         | Sed. |
| 11           | 14         | Attend a concert, movie, lecture, or sport event.             | sitting quietly, sitting smoking, listening to music (not talking or reading), watchin a movie in a theater = 1.0 |               |           | 1             | 1         | Sed. |
| NEW          | 24         | Sit and talk with friends (not on phone) or listen to music*  | Reclining -talking or talking on phone = 1.0                                                                      |               |           | 1             | 1         | Sed  |
| NEW          | 31         | travel by bus, on a regularly scheduled service*              | riding in a bus = 1.0                                                                                             |               |           | 1             | 1         | Sed  |
| NEW          | 32         | Travel by subway, metro, ferry, rail, or train                | riding in a bus = 1.0                                                                                             |               |           | 1             | 1         | Sed  |
| NEW          | 33         | Use a "dial-a-ride" service or other senior transport service | riding in a car or truck = 1.0                                                                                    |               |           | 1             | 1         | Sed  |
| NEW          | 30         | Ride in a car being driven by someone else                    | riding in a car or truck = 1.0                                                                                    |               |           | 1             | 1         | Sed  |
| 18           | 21         | Read                                                          | Most likely position for older adults to read in: Reclining reading = 1.0                                         |               |           | 1             | 1         | Sed  |
| NEW          | 23         | talk on the phone*                                            | Average of :<br>Reclining -talking or talking on phone = 1.0<br>Standing -talking or talking on the phone 1.8     |               |           | 1.4           | 1.4       | LoLi |

| Orig. Item # | New Item # | CHAMPS ITEMS                                                 | Comparable MET Values From Ainsworth and Colleagues 2000 and rationale for adjustment                                                                                                                                                                                                                                                                                                                                                                                                               | 1993 Comp MET | Orig. MET | 2000 Comp MET | Final MET | Cat. |
|--------------|------------|--------------------------------------------------------------|-----------------------------------------------------------------------------------------------------------------------------------------------------------------------------------------------------------------------------------------------------------------------------------------------------------------------------------------------------------------------------------------------------------------------------------------------------------------------------------------------------|---------------|-----------|---------------|-----------|------|
| 4            | 7          | Attend church or take part in church activities              | <p>Average of :</p> <p>sitting in church, talking or singing, attending a ceremony, sitting, active participation = 1.5</p> <p>standing in church (quietly), attending a ceremony, standing quietly = 1.2</p> <p>standing, singing in church, attending a ceremony, standing, active participation = 2.0</p> <p>Kneeling in church/at home (praying) = 1.0</p> <p>Standing, talking in church = 1.8</p> <p>Volunteer activities: sitting = meetings, general and/or with talking involved = 1.5</p> |               |           | 1.5           | 1.5       | LoLi |
| 5            | 8          | attend other club or group meetings                          | Sitting – meeting, general, and/or with talking involved = 1.5                                                                                                                                                                                                                                                                                                                                                                                                                                      |               |           | 1.5           | 1.5       | LoLi |
| 6            | 9          | use a computer                                               | typing, electric, manual, or computer = 1.5                                                                                                                                                                                                                                                                                                                                                                                                                                                         |               |           | 1.5           | 1.5       | LoLi |
| 12           | 15         | play cards, bingo, or board games with other people          | sitting = card playing, playing board games = 1.5                                                                                                                                                                                                                                                                                                                                                                                                                                                   |               |           | 1.5           | 1.5       | LoLi |
| 8            | 11         | do woodworking, needlework, drawing, or other arts or crafts | <p>Average of:</p> <p>Sitting-arts and crafts, light effort = 1.5</p> <p>Standing-arts and crafts, light effort = 1.8</p>                                                                                                                                                                                                                                                                                                                                                                           |               |           | 1.65          | 1.65      | LoLi |
| 2            | 5          | Go to the senior center                                      | Standing -talking or talking on the phone = 1.8                                                                                                                                                                                                                                                                                                                                                                                                                                                     |               |           | 1.8           | 1.8       | LoLi |

| Orig. Item # | New Item # | CHAMPS ITEMS                                                  | Comparable MET Values From Ainsworth and Colleagues 2000 and rationale for adjustment                                                                                                                                                                                                                                                       | 1993 Comp MET | Orig. MET | 2000 Comp MET | Final MET | Cat. |
|--------------|------------|---------------------------------------------------------------|---------------------------------------------------------------------------------------------------------------------------------------------------------------------------------------------------------------------------------------------------------------------------------------------------------------------------------------------|---------------|-----------|---------------|-----------|------|
| 1            | 4          | Visit with friends or family (other than those you live with) | Average of:<br>Standing -talking or talking on the phone = 1.8<br>sitting -talking or talking on the phone = 1.5<br>retreat/family reunion activities involving sitting, relaxing, talking, eating = 2.0<br>talking and eating or eating only (standing) = 2.0<br>walking to neighbor's house or family's house for social reasons, MET=2.5 |               |           | 1.825         | 1.83      | LoLi |
| NEW          | 29         | drive in a car*                                               | Automobile or light truck (not a semi) driving = 2                                                                                                                                                                                                                                                                                          |               |           | 2             | 2         | LoLi |
| 22           | 28         | Do light gardening (such as watering plants)                  | Average of:<br>Watering lawn or garden, standing or walking = 1.5<br>Walking/standing -picking up yard, light, picking flowers or vegetables = 3.0                                                                                                                                                                                          | 2.25          | 2.25      | 2.25          | 2.25      | LoLi |
| 17           | 20         | Play a Musical Instrument                                     | Consensus of:<br>cello = 2.0<br>flute (sitting) = 2.0<br>horn - 2.0<br>piano or organ = 2.5<br>Trumpet = 2.5<br>violin = 2.5<br>woodwind = 2.0<br>guitar, classical, folk (sitting) = 2.0                                                                                                                                                   |               |           | 2             | 2         | LoLi |
| 3            | 6          | Do volunteer work                                             | Average of:<br>sitting -meeting, general, and/or with talking involved = 1.5<br>walk/stand combination, for volunteer purposes = 3.0                                                                                                                                                                                                        |               |           | 2.25          | 2.25      | HiLi |

| Orig. Item # | New Item # | CHAMPS ITEMS                                                                                               | Comparable MET Values From Ainsworth and Colleagues 2000 and rationale for adjustment                                                                                                                                                | 1993 Comp MET | Orig. MET | 2000 Comp MET | Final MET | Cat. |
|--------------|------------|------------------------------------------------------------------------------------------------------------|--------------------------------------------------------------------------------------------------------------------------------------------------------------------------------------------------------------------------------------|---------------|-----------|---------------|-----------|------|
| 13           | 16         | Shoot pool or billiards                                                                                    | Billiards = 2.5                                                                                                                                                                                                                      |               |           | 2.5           | 2.5       | HiLi |
| 27           | 34         | walk to do errands (such as to/from a store or to take children to school ( <u>count walk time only</u> )) | Probably average speed for older adults:<br>walking from house to car or bus, from car or bus to go places, from car or bus to and from the worksite = 2.5<br>walking to neighbor's house or family's house for social reasons = 2.5 | 2.5           | 2.5       | 2.5           | 2.5       | HiLi |
| 28           | 36         | Walk <u>leisurely</u> for exercise or                                                                      | Probably average speed for older adults:                                                                                                                                                                                             | 2.5           | 2.5       | 2.5           | 2.5       | HiLi |
| NEW          | 37         | walk your dog*                                                                                             | walking the dog = 3.0<br>Lowered met value to walking 2.0mph to accommodate likely walking speed of older adults                                                                                                                     |               |           | 3             | 2.5       | HiLi |
| 10           | 12         | Play golf, riding a cart ( <u>count walking time only</u> )                                                | golf, using power cart (Taylor Code 070) = 3.5<br>Adjusted down for reduced exertion of older adults                                                                                                                                 | 3.5           | 2         | 3.5           | 2         | HiLi |
| 34           | 47         | Do Stretching or flexibility exercises (do <u>not</u> count yoga or tai Chi)                               | mild stretching = 2.5<br>stretching, hatha yoga = 2.5<br>Adjusted up from Stewart value because 2000 Compendium had a lower (and thus likely more appropriate) MET estimate for activities                                           | 4             | 2         | 2.5           | 2.5*      | HiLi |
| 35           | 48         | Do yoga or Tai Chi                                                                                         | mild stretching = 2.5<br>stretching, hatha yoga = 2.5<br>Adjusted up from Stewart value because 2000 Compendium had a lower (and thus likely more appropriate) MET estimate for activities                                           | 4             | 2         | 2.5           | 2.5*      | HiLi |
| 20           | 26         | Do light work around the house                                                                             | Consensus of: Multiple household tasks all at once, light effort = 2.5                                                                                                                                                               |               | 2.5       | 2.5           | 2.5       | HiLi |

| Orig. Item # | New Item # | CHAMPS ITEMS                                                                                                             | Comparable MET Values From Ainsworth and Colleagues 2000 and rationale for adjustment                                                                                                                                                                                                                                                                                               | 1993 Comp MET | Orig. MET | 2000 Comp MET | Final MET      | Cat. |
|--------------|------------|--------------------------------------------------------------------------------------------------------------------------|-------------------------------------------------------------------------------------------------------------------------------------------------------------------------------------------------------------------------------------------------------------------------------------------------------------------------------------------------------------------------------------|---------------|-----------|---------------|----------------|------|
|              |            | (such as sweeping or vacuuming)                                                                                          | cleaning, light (dusting, straightening up, changing linen, carrying out trash) = 2.5<br>vacuuming light effort = 2.5                                                                                                                                                                                                                                                               |               |           |               |                |      |
| 39           | 52         | Do general conditioning exercises, such as light calisthenics or chair exercises (do <u>not</u> count strength training) | calisthenics, home exercise, light or moderate effort, general (example: back exercises), going up & down from floor (Taylor Code 150) = 3.5<br>Adjusted down for reduced exertion of older adults                                                                                                                                                                                  | 4.5           | 2.5       | 3.5           | 2.5            | HiLi |
| 38           | 51         | Do light strength training (such as hand held weights of <u>5 lbs. or less</u> or elastic bands)                         | weight lifting (free, nautilus or universal-type), light or moderate effort, light workout, general = 3.0                                                                                                                                                                                                                                                                           | 3             | 3         | 3             | 3 <sup>†</sup> | MVPA |
| 31           | 46         | Do water exercises (do <u>not</u> count other swimming)                                                                  | water aerobics, water calisthenics = 4.0<br>Adjusted down for reduced exertion of older adults                                                                                                                                                                                                                                                                                      | 4             | 3         | 4             | 3              | MVPA |
| 33           | 44         | swim gently                                                                                                              | swimming, leisurely, not lap swimming, general = 6                                                                                                                                                                                                                                                                                                                                  | 6             | 3         | 6             | 3              | MVPA |
| 19           | 25         | Do heavy work around the house (such as washing windows, cleaning gutters)                                               | Average of:<br>Multiple household tasks all at once, moderate effort = 3.5<br>Multiple household tasks all at once, vigorous effort = 4.0<br>cleaning, heavy or major (e.g. wash car, wash windows, clean garage), vigorous effort = 3.0<br>Multiple household tasks all at once, vigorous effort = 4.0<br>Increased from Stewart as new items were available in 2000<br>Compendium | 4.5           | 3         | 3.625         | 3.63           | MVPA |

| Orig. Item # | New Item # | CHAMPS ITEMS                                                                                        | Comparable MET Values From Ainsworth and Colleagues 2000 and rationale for adjustment                                                                                                                                                                         | 1993 Comp MET | Orig. MET | 2000 Comp MET | Final MET | Cat. |
|--------------|------------|-----------------------------------------------------------------------------------------------------|---------------------------------------------------------------------------------------------------------------------------------------------------------------------------------------------------------------------------------------------------------------|---------------|-----------|---------------|-----------|------|
| 7            | 10         | dance (such as square, folk, line, ballroom) (do <u>not</u> count aerobic dance here)               | ballroom, slow (e.g. waltz, foxtrot, slow dancing), samba, tango, 19th C, mambo, chacha = 3.0<br>Value lowered from Stewart value because 2000                                                                                                                | 4.5           | 4.5       | 3             | 3         | MVPA |
| 26           | 38         | walk <u>fast or briskly</u> for exercise (do not count walking leisurely or <u>recreationally</u> ) | Average of:<br>walking, 3.5 mph, level, brisk, firm surface, walking for exercise = 3.8<br>walking, 3.0 mph, level, moderate pace, firm surface = 3.3                                                                                                         | 4             | 3.5       | 3.5           | 3.5       | MVPA |
| 15           | 18         | play doubles tennis (do not <u>count</u> singles)                                                   | Lower value chosen of:<br>tennis, doubles (Taylor Code 430) = 6.0<br>tennis, doubles = 5.0<br>Adjusted down for reduced exertion of older adults                                                                                                              | 6             | 4         | 5             | 5         | MVPA |
| 9            | 13         | play golf, carrying or pulling your equipment (count <u>walking time</u> only)                      | Average of:<br>golf, walking and carrying clubs = 4.5<br>golf, walking and pulling clubs = 4.3<br>Adjusted down for reduced exertion of older adults                                                                                                          | 5             | 3         | 4.4           | 3         | MVPA |
| 21           | 27         | do heavy gardening (such as spading, raking)                                                        | Average of:<br>Spading 5.0<br>Mowing power 4.5<br>Weeding 4.5<br>Planting bushes and seedlings 4.0<br>Raking 4.0<br>Trimming 4.5<br>Sacking leaves 4.0<br>Adjusted to reflect intermittent nature of heavy gardening, and because it uses small muscle groups | 4.4           | 4         | 4.4           | 4         | MVPA |

| Orig. Item # | New Item # | CHAMPS ITEMS                 | Comparable MET Values From Ainsworth and Colleagues 2000 and rationale for adjustment                                           | 1993 Comp MET | Orig. MET | 2000 Comp MET | Final MET | Cat. |
|--------------|------------|------------------------------|---------------------------------------------------------------------------------------------------------------------------------|---------------|-----------|---------------|-----------|------|
| 16           | 19         | skate (ice, roller, in-line) | skating, ice, 9 mph or less = 5.5<br>Value increased from Stewart value based on new activity categories within 2000 Compendium | 7             | 4.5       | 5.5           | 5.5       | MVPA |

|    |    |                                                                                                                            |                                                                                                                                                                                                                                                                                                    |   |     |     |                  |      |
|----|----|----------------------------------------------------------------------------------------------------------------------------|----------------------------------------------------------------------------------------------------------------------------------------------------------------------------------------------------------------------------------------------------------------------------------------------------|---|-----|-----|------------------|------|
| 37 | 50 | Do moderate to heavy strength training (such as hand-held weights of <u>more than 5 lbs.</u> weight machines, or push ups) | calisthenics (e.g. pushups, situps, pullups, jumping jacks), heavy, vigorous effort = 8.0<br><br>weight lifting (free weight, nautilus or universal-type), power lifting or body building, vigorous effort (Taylor Code 210) = 6.0<br>Adjusted because caloric expenditure low compared to walking | 7 | 4.5 | 7   | 4.5 <sup>†</sup> | MVPA |
| 32 | 45 | swim moderate to fast                                                                                                      | swimming laps, freestyle, fast, vigorous effort = 10.0<br>swimming laps, freestyle, slow, moderate or light effort = 7<br>Adjusted down to account for way in which older adults swim on average                                                                                                   | 8 | 5   | 8.5 | 5 <sup>†</sup>   | MVPA |
| 29 | 41 | Ride a bicycle or stationary cycle (using <u>legs only</u> ) <sup>1</sup>                                                  | Average of:<br>Bicycling, <10 mph, leisure, to work or for pleasure (Taylor Code 115) = 4.0<br><br>Bicycling, 10-11.9 mph, leisure, slow, light effort = 6<br><br>Bicycling, stationary, general = 7<br>Bicycling, stationary, 50 watts, very light effort = 3                                     | 5 | 4   | 5.1 | 4                | MVPA |

| Orig. Item # | New Item # | CHAMPS ITEMS                                              | Comparable MET Values From Ainsworth and Colleagues 2000 and rationale for adjustment                              | 1993 Comp MET | Orig. MET | 2000 Comp MET | Final MET | Cat. |
|--------------|------------|-----------------------------------------------------------|--------------------------------------------------------------------------------------------------------------------|---------------|-----------|---------------|-----------|------|
|              |            |                                                           | Bicycling, stationary, 100 watts, light effort = 5.5<br>Adjusted down for likely lower resistance for older adults |               |           |               |           |      |
| NEW          | 35         | bicycle <u>to do errands</u> (count bicycling time only)* | Same Rules used for Ride a bicycle or stationary cycle.                                                            |               |           | 5.1           | 4         | MVPA |
|              | 36         | 49 Do aerobics or aerobic dancing                         | aerobic, general = 6.5<br>Adjusted down for reduced                                                                | 5             | 3.5       | 6.5           | 3.5       | MVPA |

|           |    |                                                                                                                 |                                                                                                                                                                                                  |     |   |      |                |      |
|-----------|----|-----------------------------------------------------------------------------------------------------------------|--------------------------------------------------------------------------------------------------------------------------------------------------------------------------------------------------|-----|---|------|----------------|------|
| MOD of 30 | 42 | Do aerobics machines involving <u>arms and legs</u> (such as rowing or cross-country ski machines) <sup>2</sup> | Average of:<br>ski machine, general = 7.0<br>rowing, stationary ergometer, general = 7<br>rowing, stationary, 50 watts, light effort = 3.5<br>Adjusted down for reduced exertion of older adults | 7   | 5 | 5.83 | 5 <sup>†</sup> | MVPA |
|           | 25 | 39 walk uphill or hike uphill (count only the uphill part)                                                      | walking, 3.5 mph, uphill = 6                                                                                                                                                                     | 6   | 6 | 6    | 6              | MVPA |
|           | 14 | 17 Play Singles tennis (do not <u>count</u> doubles)                                                            | tennis, singles (Taylor Code 420) = 8<br>Adjusted down for reduced exertion of older adults                                                                                                      | 8   | 6 | 8    | 6              | MVPA |
|           | 40 | 53 Play basketball, soccer, or racquetball (do <u>not</u> count time on sidelines)                              | Average of:<br>basketball, game (Taylor Code 490) = 8<br>basketball, non-game, general (Taylor Code 480) = 6<br>basketball, shooting baskets = 4.5<br>soccer = 7                                 | 7.1 | 5 | 6.5  | 5              | MVPA |



| Orig. Item #                                                                                                                                                                                                                                                                                                                                                                                                                                                                                                                                                                                                                                                                                            | New Item # | CHAMPS ITEMS             | Comparable MET Values From Ainsworth and Colleagues 2000 and rationale for adjustment | 1993 Comp MET | Orig. MET | 2000 Comp MET | Final MET | Cat. |
|---------------------------------------------------------------------------------------------------------------------------------------------------------------------------------------------------------------------------------------------------------------------------------------------------------------------------------------------------------------------------------------------------------------------------------------------------------------------------------------------------------------------------------------------------------------------------------------------------------------------------------------------------------------------------------------------------------|------------|--------------------------|---------------------------------------------------------------------------------------|---------------|-----------|---------------|-----------|------|
|                                                                                                                                                                                                                                                                                                                                                                                                                                                                                                                                                                                                                                                                                                         |            |                          | racquetball = 7<br>Adjusted down for reduced exertion of older adults                 |               |           |               |           |      |
| 24                                                                                                                                                                                                                                                                                                                                                                                                                                                                                                                                                                                                                                                                                                      | 40         | Jog or Run               | jogging, general = 7                                                                  | 7             | 7         | 7             | 7         | MVPA |
| MOD of 30                                                                                                                                                                                                                                                                                                                                                                                                                                                                                                                                                                                                                                                                                               | 43         | do stair or step machine | Stair-treadmill ergometer, general = 9                                                | 7             | 5         | 9             | 7         | MVPA |
| <p><sup>†</sup>Items that had a lower estimated value for mid-life and older adults. *items were not part of the original CHAMPS, Stewart et al. 2001. They were added for this assessment. Also note that the item, "Work on your car, truck, lawn mower, or other machinery" was not asked in this version of the CHAMPS.</p> <p><sup>1</sup>(using legs only) was added to this version of the CHAMPS</p> <p><sup>2</sup>The wording of this item was changed from the original CHAMPS to distinguish full body aerobic activity from lower-body only activity(original item 30, Do other aerobics machines such as rowing or step machines (do <u>not</u> count treadmill or stationary cycle).</p> |            |                          |                                                                                       |               |           |               |           |      |
